# Supplementary material for: An l-lysine derived organogelator-based stationary phase for mixed-mode liquid chromatography
Source: Royal Society of Chemistry journal article supplement (doi:10.1039/c5ay00405e), 2015-01-01
Supplement: c5ay00405e1.pdf [file c5ay00405e1.pdf]

## Supporting Information

# L-lysine derived organogelator-based stationary phase for mixed-mode liquid chromatography

Sudhina Guragain, † Abul K. Mallik, † Makoto Takafuji and Hirotaka Ihara\*

## 1. Materials and methods

### 1.1 Materials

Sulfaquinoxaline and sulfamonomethoxine were obtained from Wako (Osaka, Japan). sulfamethoxazole, sulfamethizole, sulfanilamide and sulfathiazole were obtained from TCI (Tokyo, Japan). Sulfamerazine and sulfadiazine were obtained from Sigma (St Louis, MO, USA). All the analytes were used without further purification. HPLC grade solvents hexane, tetrahydrofuran and acetonitrile were purchased from Nacalai Tesque (Tokyo, Japan) whereas ethanol was purchased from Wako (Osaka, Japan). Ammonium acetate was purchased from Wako and acetic acid from Sigma-Aldrich. All nucleobases were commercially available and were used without further purification.

### 1.2 Chromatographic Conditions

L-lysine-based organic phases on silica (Sil-Lys-Urea and Sil-Lys-Amide) stationary phases were packed into a stainless steel column (150 mm × 4.6 mm i.d.). YMC silica (YMC SIL-120-S5 having a 5 μm diameter, and a 12 nm pore size) was used. We used commercial amide column (Inertsil® Amide for HILIC separation from GL Sciences) (150 mm × 4.6 mm i.d.) packed with carbamoyl bonded spherical silica (5 μm diameter and 100 Å pore size) as one of the reference columns. HPLC-grade acetonitrile and Milipore water were used as components of the mobile phase for HILIC whereas HPLC grade Hexane, THF and Ethanol were used as mobile phase for normal phase chromatography. The HILIC mode measurements were carried out in a chromatographic system that included JASCO PU-2089 Plus pump and JASCO MD-910 multi-wavelength detector. 5 μL sample was injected through a Rheodyne model 7725 sample injector having 200 μL loop. On the other hand

normal phase measurements were carried out in a chromatographic system that included JASCO PU-980 pump, JASCO MD-2010 multi-wavelength detector and JASCO CD-2095 chiral detector. In this case, sample was injected through Rheodyne model 7725 injector having 20  $\mu\text{L}$  loop. A personal computer connected to the detector and pump with ChromNAV (1.17 or later) software was used for system control and data analysis. Chromatographic grade solvent was used to prepare mobile phase solutions. The retention factor ( $k$ ) was calculated using the equation:

$$k = \frac{(t_r - t_0)}{t_0} \quad (1)$$

Where,  $t_r$  is the retention time of the sample and  $t_0$  is the void time.  $t_0$  was calculated by injecting water in the case of HILIC mode. However, in case of normal phase chromatography  $t_0$  was determined by noting the solvent peak position in the chromatogram for real samples.

Selectivity was given by:

$$\alpha = \frac{k_2}{k_1} \quad (2)$$

Where,  $k_2$  is the retention factor for more strongly retained compound and  $k_1$  is that for less strongly retained compound.

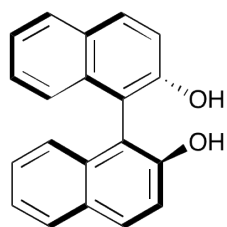

**Fig. S1** Structure of 1, 1'-bi-2-naphthol.

---

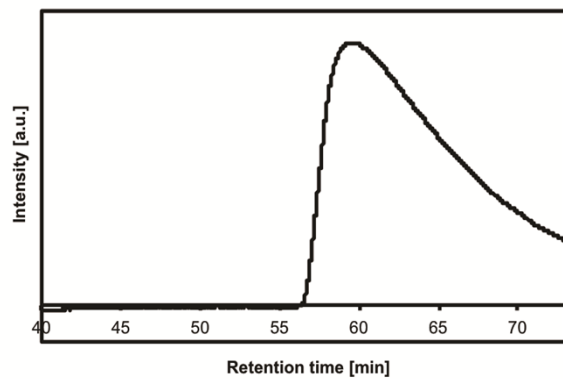

**Fig. S2** Separation of mixture of *R*(+)- and *S*(-)- 1,1'-bi-2-naphthol into its constituent isomers with Sil-Lys-Amide column as detected by UV detector. Mobile phase: hexane: tetrahydrofuran: ethanol; 70:30:0.5 at 0 °C, flow rate 1 mL min<sup>-1</sup>,  $\lambda$ = 254 nm.

---

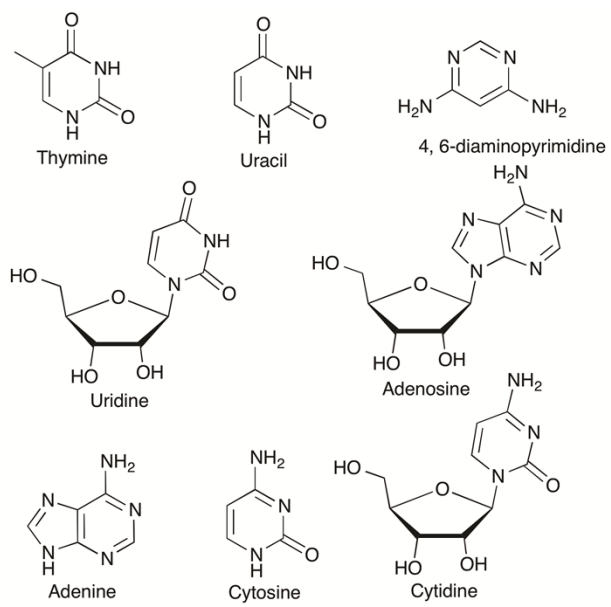

**Fig. S3** Structure of nucleobase analytes.

---

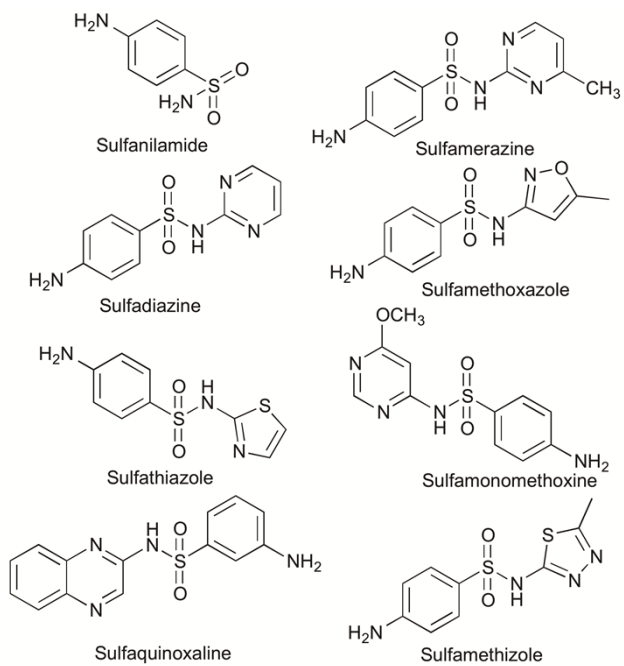

**Fig. S4** Structures of sulfonamide antibiotic analytes.

---

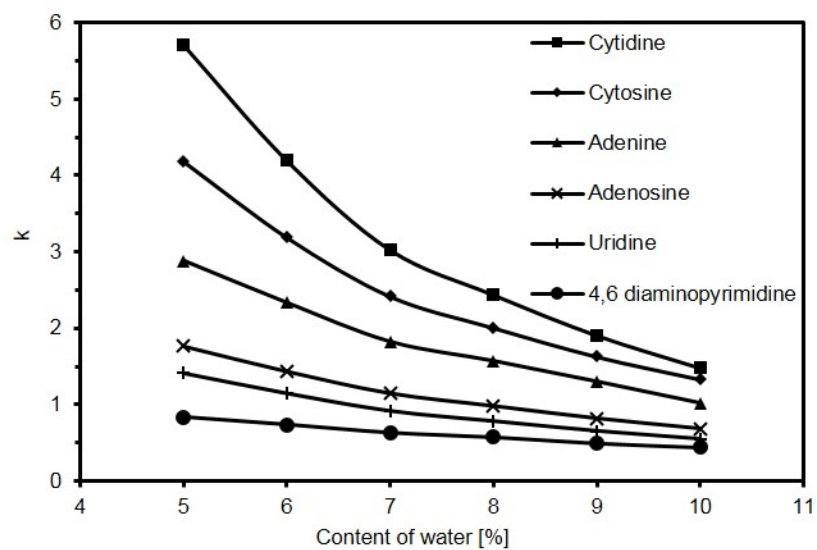

**Fig. S5** Effect of water content on the retention behavior of some nucleobases with Sil-Lys-Urea column. Mobile phase is acetonitrile and ammonium acetate (20 mM, pH 6.7) with water content as indicated. Flow rate  $1\text{ mL min}^{-1}$ ,  $T = 25\text{ }^{\circ}\text{C}$ ,  $\lambda = 254\text{ nm}$ .

**Table S1**  $t_R$ , resolution ( $R_s$ ),  $k$ ,  $\alpha$  and number of theoretical plates ( $N$ ) of sulfur drugs for the Sil-Lys-Urea column at different buffer salt concentration. Mobile phase: acetonitrile: ammonium acetate (pH 6.7); 90:10, flow rate 1 mL min<sup>-1</sup>,  $T=25\text{ }^\circ\text{C}$ ,  $\lambda=275\text{ nm}$ .

| Sulfur Drugs       | 10 mM  |        |        |          |      | 15 mM  |        |       |          |      | 20 mM  |        |       |          |      |
|--------------------|--------|--------|--------|----------|------|--------|--------|-------|----------|------|--------|--------|-------|----------|------|
|                    | $t_R$  | $R_s$  | $k$    | $\alpha$ | $N$  | $t_R$  | $R_s$  | $k$   | $\alpha$ | $N$  | $t_R$  | $R_s$  | $k$   | $\alpha$ | $N$  |
| Sulfuramide        | 1.867  | 4.429  | 0.037  | -        | 1253 | 1.880  | 3.383  | 0.038 | -        | 896  | 1.893  | 2.637  | 0.046 | -        | 814  |
| Sulfamerazine      | 2.627  | 5.636  | 0.459  | 12.394   | 6220 | 2.520  | 5.204  | 0.392 | 10.142   | 6191 | 2.400  | 4.446  | 0.325 | 7.082    | 6414 |
| Sulfadiazine       | 3.493  | 4.956  | 0.940  | 2.048    | 6366 | 3.280  | 4.161  | 0.812 | 2.070    | 6343 | 3.000  | 3.528  | 0.657 | 2.016    | 6334 |
| Sulfamethoxazole   | 4.507  | 5.035  | 1.503  | 1.598    | 5888 | 4.067  | 4.022  | 1.246 | 1.535    | 5758 | 3.613  | 3.579  | 0.996 | 1.515    | 5339 |
| Sulfathiazole      | 5.773  | 6.641  | 2.207  | 1.467    | 7339 | 4.960  | 6.110  | 1.740 | 1.395    | 7376 | 4.333  | 5.670  | 1.394 | 1.399    | 7109 |
| Sulfamonomethoxine | 7.987  | 4.376  | 3.437  | 1.557    | 6417 | 6.653  | 3.597  | 2.675 | 1.537    | 6715 | 5.720  | 3.296  | 2.160 | 1.549    | 6453 |
| Sulfaquinolone     | 9.827  | 21.677 | 4.459  | 1.297    | 7824 | 7.880  | 18.064 | 3.353 | 1.253    | 7700 | 6.693  | 16.100 | 2.697 | 1.248    | 7592 |
| Sulfamethizole     | 25.893 | -      | 13.385 | 3.001    | 9881 | 17.840 | -      | 8.856 | 2.640    | 9138 | 14.227 | -      | 6.860 | 2.542    | 8132 |

  

| 25 mM |        |       |          |      |
|-------|--------|-------|----------|------|
| $t_R$ | $R_s$  | $k$   | $\alpha$ | $N$  |
| 1.880 | 2.844  | 0.038 | -        | 1337 |
| 2.333 | 3.757  | 0.289 | 7.475    | 6709 |
| 2.813 | 2.938  | 0.554 | 1.917    | 6259 |
| 3.293 | 4.186  | 0.819 | 1.478    | 5051 |
| 4.093 | 4.309  | 1.261 | 1.539    | 6847 |
| 5.067 | 2.955  | 1.799 | 1.426    | 6312 |
| 5.840 | 14.880 | 2.226 | 1.237    | 7507 |
| 12.42 | -      | 5.865 | 2.634    | 6468 |



**Table S2**  $t_R$ ,  $R_s$ ,  $k$ ,  $\alpha$  and  $N$  of nucleobases for the Sil-Lys-Urea column at different buffer salt concentration (for 20 mM buffer salt concentration please refer to Table S3 pH 6.7). Mobile phase: acetonitrile: ammonium acetate (pH 6.7); 95:5, flow rate 1 mL min<sup>-1</sup>,  $T=25$  °C,  $\lambda=254$  nm.

| Nucleobases              | 10 mM |       |      |          |      | 15 mM |       |      |          |      | 25mM  |       |      |          |      |
|--------------------------|-------|-------|------|----------|------|-------|-------|------|----------|------|-------|-------|------|----------|------|
|                          | $t_R$ | $R_s$ | $k$  | $\alpha$ | $N$  | $t_R$ | $R_s$ | $k$  | $\alpha$ | $N$  | $t_R$ | $R_s$ | $k$  | $\alpha$ | $N$  |
| Thymine                  | 3.04  | 1.19  | 0.51 | -        | 2143 | 3.08  | 1.16  | 0.52 | -        | 1979 | 3.04  | 1.10  | 0.49 | -        | 1988 |
| Uracil                   | 3.34  | 1.61  | 0.66 | 1.30     | 2815 | 3.39  | 1.71  | 0.68 | 1.30     | 2819 | 3.32  | 1.76  | 0.63 | 1.28     | 3074 |
| 4,6<br>diaminopyrimidine | 3.79  | 3.42  | 0.88 | 1.33     | 2642 | 3.87  | 3.43  | 0.91 | 1.35     | 2523 | 3.80  | 3.29  | 0.86 | 1.37     | 2457 |
| Uridine                  | 5.04  | 1.68  | 1.51 | 1.70     | 2102 | 5.17  | 1.70  | 1.56 | 1.71     | 2055 | 5.04  | 1.65  | 1.47 | 1.70     | 2020 |
| Adenosine                | 5.80  | 5.32  | 1.88 | 1.25     | 2457 | 5.97  | 5.13  | 1.96 | 1.25     | 2391 | 5.80  | 4.70  | 1.84 | 1.25     | 2366 |
| Adenine                  | 8.67  | 3.20  | 3.31 | 1.76     | 3194 | 8.82  | 3.72  | 3.37 | 1.72     | 3180 | 8.29  | 4.21  | 3.06 | 1.66     | 3192 |
| Cytosine                 | 10.76 | 4.33  | 4.35 | 1.31     | 3815 | 11.34 | 4.50  | 4.62 | 1.37     | 3834 | 11.00 | 4.39  | 4.39 | 1.43     | 3917 |
| Cytidine                 | 14.37 | -     | 6.15 | 1.41     | 3471 | 15.32 | -     | 6.58 | 1.43     | 3484 | 14.72 | -     | 6.21 | 1.41     | 3483 |

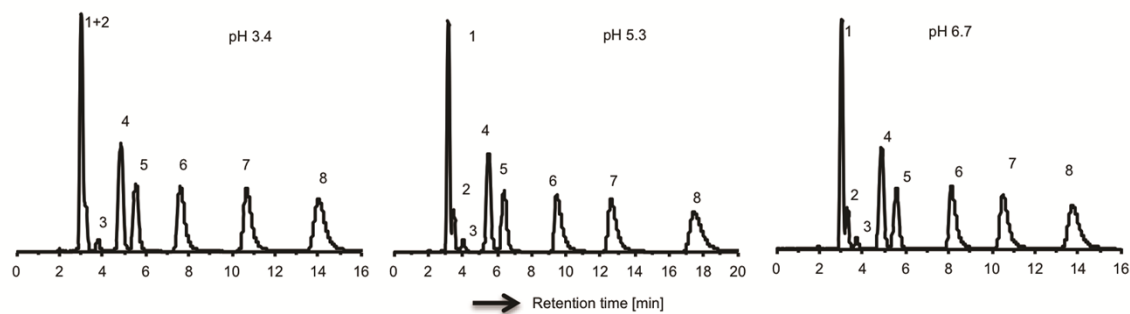

**Fig. S6** Separation of nucleobases for the Sil-Lys-Urea column at different buffer pH. Mobile phase: acetonitrile: ammonium acetate (20 mM); 95:5, flow rate 1 mL min<sup>-1</sup>, *T*= 25 °C,  $\lambda$ = 254 nm.

**Table S3**  $t_R$ ,  $R_s$ ,  $k$ ,  $\alpha$  and  $N$  of nucleobases for the Sil-Lys-Urea column at different buffer pH. Mobile phase: acetonitrile: ammonium acetate (20 mM); 95:5, flow rate 1 mL min<sup>-1</sup>, *T*= 25 °C,  $\lambda$ = 254 nm.

| Nucleo-<br>bases          | pH 3.4 |       |      |          |      | pH 5.3 |       |      |          |      | pH 6.7 |       |      |          |      |
|---------------------------|--------|-------|------|----------|------|--------|-------|------|----------|------|--------|-------|------|----------|------|
|                           | $t_R$  | $R_s$ | $k$  | $\alpha$ | $N$  | $t_R$  | $R_s$ | $k$  | $\alpha$ | $N$  | $t_R$  | $R_s$ | $k$  | $\alpha$ | $N$  |
| Thymine                   | 3.01   | 2.65  | 0.48 | -        | 1864 | 3.17   | 1.07  | 0.55 | -        | 1758 | 3.01   | 1.15  | 0.48 | -        | 2247 |
| Uracil                    |        |       |      |          |      | 3.48   | 1.81  | 0.71 | 1.27     | 2654 | 3.29   | 1.58  | 0.62 | 1.28     | 3177 |
| 4,6-diamino<br>pyrimidine | 3.79   | 2.89  | 0.86 | 1.79     | 2452 | 4.03   | 3.54  | 0.97 | 1.38     | 2297 | 3.71   | 3.31  | 0.83 | 1.33     | 2605 |
| Uridine                   | 4.85   | 1.51  | 1.38 | 1.61     | 2002 | 5.52   | 1.67  | 1.76 | 1.75     | 1880 | 4.88   | 1.58  | 1.40 | 1.70     | 2159 |
| Adenosine                 | 5.53   | 3.82  | 1.71 | 1.24     | 2236 | 6.4    | 4.84  | 2.14 | 1.25     | 2178 | 5.56   | 5.08  | 1.74 | 1.24     | 2516 |
| Adenine                   | 7.60   | 4.82  | 2.72 | 1.59     | 2433 | 9.47   | 4.01  | 3.64 | 1.7      | 2747 | 8.11   | 3.88  | 2.99 | 1.72     | 3327 |
| Cytosine                  | 10.67  | 4.27  | 4.23 | 1.55     | 4185 | 12.63  | 4.57  | 5.19 | 1.42     | 3482 | 10.51  | 4.08  | 4.18 | 1.39     | 3835 |
| Cytidine                  | 14.01  | -     | 5.87 | 1.39     | 3778 | 17.45  | -     | 7.55 | 1.45     | 3062 | 13.73  | -     | 5.76 | 1.38     | 3660 |

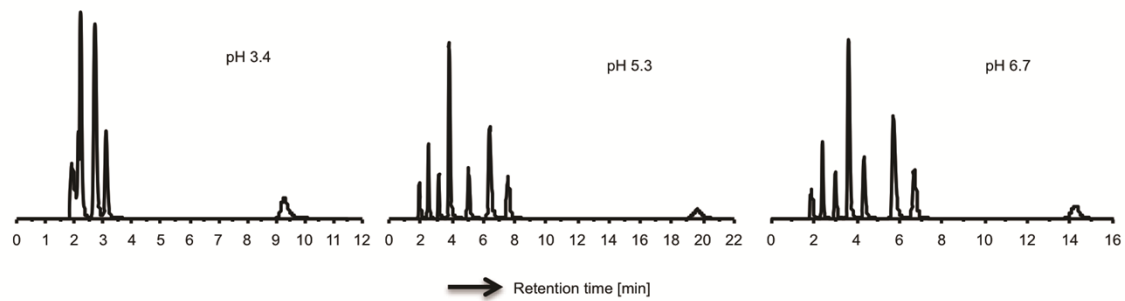

**Fig. S7** Separation of sulfur based drugs for the Sil-Lys-Urea column at different buffer pH. Mobile phase: acetonitrile: ammonium acetate (20 mM); 90:10, flow rate 1 mL min<sup>-1</sup>, T= 25 °C, λ= 275 nm.

---
